# Supplementary material
Source: publisher figshare collection journal article supplement (https://aacr.figshare.com/articles/dataset/_/23553186)
Supplement: Supplementary file 1 [file 41323695]

**A**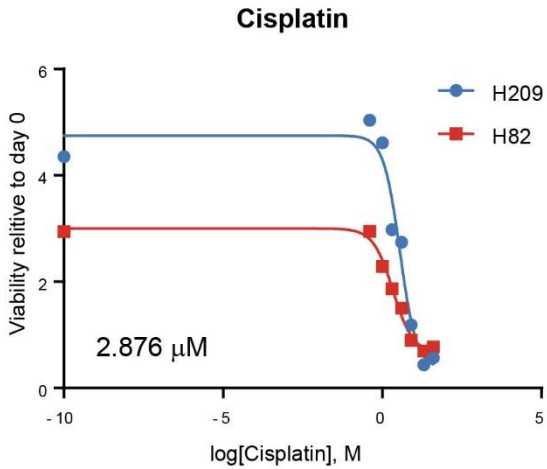**B**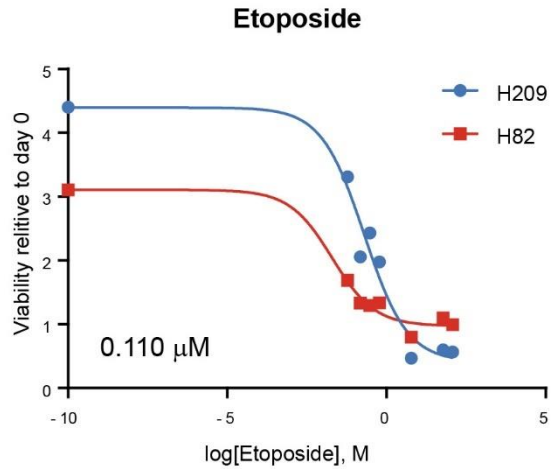

**Supplementary Figure S13 | Determining effective concentrations for treatment of SCLC cell lines with cisplatin and etoposide. IC<sub>50</sub> curves for the NCI-H20 9 and NCI-H82 cell lines determined by an alamar blue assay for both cisplatin (A) or etoposide (B).**
